# Supplementary material
Source: publisher figshare collection journal article supplement (https://tandf.figshare.com/ndownloader/files/17829185)
Supplement: Supplementary file 1 [file 17829185]

## Sheet: Table S1
	Table S1. The expression changes of 169 cell proliferation-related genes during rat liver regeneration.
	Gene Symbol	0	2	6	12	24	30	36	72	120	168h
	Ahr	1	0.631116	0.251929	0.678436	0.457212	0.56825	0.228686	0.487366	0.296362	0.381317
	Ar	1	6.10959	1.5259	1.71855	0.676135	1.88886	1.56661	1.66327	1.7944	2.47601
	Aspm	1	1.05047	1.76363	1.64166	10.6499	8.25334	11.0838	4.06797	2.30573	0.798238
	Atf3	1	12.1729	4.30084	2.00952	3.80702	2.83422	2.22696	3.78684	2.73488	2.6602
	Atf5	1	0.670277	0.838163	0.508776	0.356751	0.847502	0.940972	0.264672	0.540733	0.735707
	Aurkb	1	0.755194	0.89492	1.11268	7.66704	4.55375	6.566	3.20791	1.85573	0.801623
	Birc5	1	0.65823	1.23959	1.20801	4.91791	5.71469	7.96578	4.33684	2.53691	0.581222
	Brca1	1	0.773119	0.981235	1.52398	6.9858	6.15037	5.86334	2.33869	1.64356	0.943207
	Btg2	1	12.5293	3.56885	1.35403	4.96124	1.73978	2.02235	2.06982	1.92862	3.38133
	Bub1	1	0.535181	0.48261	0.773079	15.3598	12.4612	16.5721	5.93077	2.85843	0.710554
	Bub1b	1	0.535123	1.4216	3.11659	17.8391	10.7021	16.9416	10.4327	4.66861	0.774723
	Cacnb4	1	2.0012	10.2282	3.29121	0.75841	0.933663	0.785492	0.356609	0.384355	0.468964
	Ccl2	1	6.29469	7.29298	11.4861	4.66384	9.1116	2.57836	50.055	2.12601	1.53387
	Ccl5	1	2.00214	5.2132	3.40993	0.721787	0.696962	0.686791	2.3194	1.12969	0.853785
	Ccna2	1	0.589252	0.731632	0.93639	13.3491	11.3985	13.7664	5.2753	2.52778	0.46529
	Ccnb1	1	0.765662	0.859519	0.854301	9.4245	8.6182	13.3494	5.34554	3.41611	0.64268
	Ccnd1	1	1.43479	1.87047	2.33586	4.5404	7.25801	4.02922	7.98251	1.8856	1.30998
	Ccne1	1	0.930522	1.04209	1.3995	3.71579	6.38816	2.52881	1.32546	0.542775	0.640712
	Ccne2	1	0.904013	1.28474	1.76407	4.59442	5.37506	2.46299	1.42762	0.941752	1.14002
	Ccnf	1	0.525803	1.10233	1.21544	6.53389	6.02672	5.34249	2.69013	2.25418	1.58205
	Ccng2	1	0.362476	0.349413	0.258242	0.901644	0.569987	1.24637	1.30391	1.21475	0.889527
	Ccnl1	1	3.51369	1.79664	1.85218	0.771133	0.761966	0.670629	0.71914	0.724024	0.898785
	Ccr2	1	1.20854	2.33563	2.07004	0.931737	0.937172	0.549774	4.67054	0.718364	0.702918
	Ccr5	1	3.24029	7.37215	4.3442	2.03682	1.5914	1.47564	6.31645	2.76466	2.11414
	Cd44	1	2.78839	7.36955	6.88538	3.22826	7.17204	2.46564	14.7854	1.12575	0.869925
	Cdc20	1	0.790358	0.816878	1.11175	7.54366	4.77651	7.19596	2.5606	2.46945	0.796371
	Cdc25b	1	1.96861	1.36686	4.50129	3.20374	3.46196	6.74607	2.83724	2.30103	2.67335
	Cdc2a	1	0.766772	0.698552	0.838875	19.1745	12.9688	19.0533	7.79758	3.53058	0.670312
	Cdca1	1	0.763615	0.757	0.74231	9.12127	7.96667	9.12133	3.3815	1.99183	0.727168
	Cdca5	1	0.749057	0.676412	0.679025	6.48123	5.64782	6.05151	2.20969	1.09228	0.524912
	Cdca7	1	0.723076	0.682297	2.59895	5.44041	5.24598	3.141	5.47532	1.92602	1.92354
	Cdca8	1	0.945261	1.14977	2.10505	11.2557	15.3849	12.7062	7.36538	4.12002	1.61189
	Cdh1	1	7.49275	3.25927	7.64468	1.0449	0.682191	2.3366	2.63997	2.04396	3.83589
	Cdkn2c	1	1.08467	1.11745	1.41974	6.05963	3.28388	6.62165	2.43271	2.01934	1.14518
	Cdkn3	1	1.04843	0.748528	0.784589	10.2967	10.4163	24.6078	7.62576	5.31775	0.780547
	Cenpe	1	1.4943	1.22989	1.24982	37.7507	25.0906	33.7661	13.493	2.58152	2.5514
	Cenpf	1	1.38833	0.570138	1.72093	6.97972	4.97756	4.41162	1.60357	0.772877	1.55427
	Cetn2	1	0.741723	0.457083	0.232146	0.489106	0.567337	0.858525	1.0016	1.42625	1.07349
	Cflar	1	1.77173	1.81737	3.92111	1.43154	0.89023	0.837399	1.17676	1.05869	1.48011
	Cgref1	1	0.164141	2.48387	5.86265	1.52834	16.3171	2.68655	0.833411	0.804359	0.526392
	Ckap2	1	0.967476	2.89415	2.90903	90.9549	66.2055	91.9777	35.2105	14.3016	2.16701
	Clmn	1	0.832511	0.383175	0.772419	0.25653	0.624695	0.4277	0.226025	0.23843	0.505884
	Comt	1	1.17741	0.626048	0.21973	0.409799	0.379334	0.228176	0.74658	1.03301	0.797014
	Coro1a	1	2.1321	6.03094	4.26452	1.61046	2.29136	1.25891	7.13102	1.26644	1.51814
	Ctgf	1	8.03451	4.01537	3.71433	1.13396	1.28211	1.13262	3.03806	2.07436	1.56802
	Cx3cl1	1	1.61713	2.64142	1.33261	1.03831	0.705929	1.47032	17.6718	0.658151	0.82065
	Cxcl1	1	8.7839	4.19811	3.37856	4.1595	0.943466	1.10089	3.20239	0.993627	1.52214
	Cxcl10	1	0.990893	3.1223	1.38077	1.65562	3.33502	1.14316	13.3983	1.20805	0.680554
	Cxcl9	1	1.20068	4.494	3.94034	0.64523	1.08808	0.879879	10.1016	2.23358	0.665294
	Cxcr4	1	2.21866	4.34553	2.81358	1.28531	2.14839	1.71575	4.86424	1.16189	1.11208
	Ddx11	1	0.667232	0.556126	0.914534	3.72937	4.34191	4.27108	1.53099	1.14383	0.801577
	Dmbt1	1	1.09804	2.52919	5.30606	1.82338	1.89708	1.15555	2.11936	0.194972	0.457843
	E2f8	1	0.843071	1.04465	1.34681	5.41388	6.7789	4.847	2.08801	1.48868	1.28963
	Ect2	1	0.586314	0.6258	0.37038	15.9323	13.3705	19.0483	6.36985	3.45983	0.576071
	Ednrb	1	1.01008	0.881746	1.54394	1.13222	1.02556	0.958452	3.66239	1.72164	1.9157
	Egf	1	0.524478	0.231647	0.278924	0.283351	0.181636	0.157099	0.112188	0.34113	0.553267
	Erbb3	1	0.81312	0.702601	0.310887	0.632297	0.533025	0.729663	0.588726	0.81312	0.571917
	Espl1	1	0.700166	0.880584	1.10763	12.9547	10.8675	11.2092	3.80075	1.84939	1.01225
	Fgfr1	1	0.77926	0.52864	0.914165	0.38812	0.286586	0.366472	0.243612	0.126046	0.378067
	Gadd45a	1	7.90425	3.20873	1.40467	3.24385	1.6789	2.14588	2.42498	1.91474	1.44851
	Gadd45b	1	15.1388	11.3091	1.53807	5.99858	1.90716	2.53615	3.20094	2.43987	2.10553
	Gadd45g	1	15.7021	7.70636	2.08655	6.82252	2.09309	1.69548	2.71385	2.96851	7.97012
	Gkn1	1	0.805124	1.09188	0.6613	0.907863	0.827657	0.816161	0.0949095	0.734148	0.639382
	Gmnn	1	0.825032	1.24648	3.63536	6.83518	5.01346	5.72854	3.38908	1.00211	1.27967
	Gng2	1	0.687136	1.2659	1.19223	1.05998	1.44951	0.928347	3.82266	1.92155	1.39789
	Gnl3	1	2.40987	2.92178	3.35439	0.971803	1.59966	1.20559	1.0986	0.878888	1.28296
	Gucy2c	1	0.912507	4.6261	7.39121	10.9831	15.6853	3.98748	2.39563	0.558822	0.867497
	Hck	1	1.09235	2.25717	1.41804	0.996264	2.06236	0.71696	4.32832	1.26332	1.80329
	Hgf	1	3.8591	3.88144	11.4487	4.82387	2.40846	4.08831	8.13346	1.24608	2.3438
	Hp1bp3	1	0.6478	0.622784	0.635946	0.368245	0.49336	0.386014	0.238003	0.285816	0.389441
	Hpgd	1	0.552424	0.172446	0.415069	0.458452	0.311627	0.222879	0.512725	0.82215	0.96915
	Hrsp12	1	0.978212	0.500534	0.216251	0.428798	0.368433	0.592671	0.640118	0.94147	1.23246
	Hspa1a	1	0.698474	0.259083	1.00962	1.83133	0.57985	0.670629	0.584145	0.167161	0.116754
	Il10	1	5.9726	16.3327	4.10654	0.992395	8.20866	0.77229	31.1458	3.93013	3.18069
	Il1b	1	1.74656	2.97305	2.13439	0.695259	4.47949	0.702953	10.4155	0.920609	2.21667
	Iqgap3	1	0.60822	0.988582	0.623562	5.06349	5.87384	4.92234	2.16336	1.45606	0.738111
	Irs2	1	3.71406	2.68524	1.29288	1.35324	1.06666	2.26918	1.91377	2.33886	1.48582
	Jun	1	2.77216	2.04346	1.84056	4.4196	2.04837	2.33105	2.00954	2.4311	2.90355
	Junb	1	4.23475	3.05723	1.49797	3.80163	1.15696	1.70496	1.6012	0.99573	1.46705
	Kalrn	1	10.6345	6.0002	22.8	0.637152	6.93763	1.95548	6.46956	1.92323	6.78735
	Kdr	1	0.554741	0.432951	0.807915	0.41216	0.245793	0.299108	0.651699	0.544883	0.783277
	Kif11	1	0.8599	1.20478	1.22692	12.6012	7.25322	8.60452	5.09668	3.16775	1.27984
	Kif22	1	0.94654	1.04542	1.17008	15.8126	16.0311	20.2864	6.42696	3.42097	0.872926
	Kif23	1	0.917142	0.982641	1.40924	7.37715	7.20144	6.71762	5.83331	2.11975	1.03153
	Kif2c	1	0.579932	0.733158	0.507064	10.3077	7.40213	11.0409	4.13254	2.36098	0.393199
	Kifc1	1	0.597167	0.888686	0.980492	10.8067	9.96057	11.2815	4.06541	2.21424	0.641897
	KLF9	1	5.15461	2.75214	1.74429	0.525239	0.701498	0.595832	0.699255	0.387896	2.0317
	Kntc1	1	0.813046	0.697316	1.17659	6.93501	5.09601	4.98491	2.5894	1.16312	1.04098
	Lama5	1	1.77602	1.50744	1.75276	3.3129	3.30073	4.61282	7.0684	2.5582	1.47727
	Lamc2	1	4.19091	4.64693	3.87976	2.12344	2.98052	2.52021	12.6769	2.43881	2.06858
	Lifr	1	0.119632	0.965292	0.231266	0.431761	0.170995	0.365398	0.292268	0.418519	0.373072
	Lig1	1	0.850344	1.01348	1.30487	4.11805	3.98118	3.58081	1.94366	1.08272	0.829225
	LOC684871	1	13.3635	15.112	7.14617	3.31606	2.60992	1.80436	5.31678	4.72034	5.20485
	Lzts1	1	0.225231	0.645788	1.24041	1.67657	1.52674	0.685897	1.09583	1.7782	1.16088
	Mad2l1	1	0.65164	0.634028	1.09143	6.70263	6.02548	7.65881	3.95097	1.717	0.437098
	Mapk14	1	3.00888	1.4488	1.3111	0.474206	0.574516	0.456103	0.30646	0.312695	0.537931
	Mcc	1	1.20983	1.3183	1.10396	0.323191	0.422466	0.519418	0.612254	0.742986	0.175311
	Mcm10	1	1.783	2.3285	2.03109	4.17078	4.44105	4.70513	2.62058	1.30325	0.988827
	Mcm7	1	1.16683	1.64006	1.48223	5.00358	4.78817	3.63435	1.84122	0.996157	0.769858
	Mki67	1	0.75563	0.940283	0.922763	22.4586	21.4434	25.9237	8.18815	3.33263	0.751975
	Mmp9	1	1.27809	4.46584	6.99288	2.13029	5.295	0.813851	7.11801	0.531081	0.727516
	Msn	1	1.51319	1.56415	1.24248	1.76957	1.12239	1.00005	5.15601	1.48598	0.98249
	Myc	1	7.44428	5.44141	1.46604	1.82521	2.93693	1.42668	2.10411	2.22807	2.84358
	Myh10	1	0.736935	0.606023	1.95776	9.53994	6.06956	5.63521	5.93165	6.01187	3.02082
	Nf1	1	0.315724	0.93604	1.26609	0.22752	0.826342	0.269304	0.35383	0.119482	0.262702
	Nfkbia	1	1.98725	2.01809	1.36588	0.805758	1.22849	1.06437	3.83553	1.54319	1.84315
	Nos3	1	5.50017	3.63435	4.33258	0.800163	2.0916	0.922364	0.636471	0.369923	1.65836
	Nr3c1	1	0.93476	0.227904	0.599803	0.591186	0.545868	0.606826	0.413265	0.918631	1.56347
	Nusap1	1	0.672206	0.434536	0.68121	9.18451	4.21758	7.90852	3.44025	1.95729	0.516207
	Orc1l	1	0.257127	1.89895	0.924611	4.88678	6.01214	2.58591	2.28821	1.37117	0.663922
	Osmr	1	1.18661	4.85392	3.79166	4.96648	3.89776	3.23004	6.12093	2.23499	1.55279
	Pak3	1	0.916176	1.11784	0.61381	0.311797	0.727814	0.203903	0.203487	0.271073	0.952865
	Pbk	1	0.469677	0.442982	0.462321	12.9499	7.58439	9.44323	2.47478	1.16529	0.597254
	Pcna	1	0.956886	1.26332	0.948413	4.71489	3.79579	3.27666	2.64183	1.17075	1.0986
	Plk1	1	1.2351	2.17121	2.66775	12.3411	16.4886	15.8053	7.02034	5.15733	0.560917
	Plk4	1	1.01771	1.2263	1.72756	17.8566	17.2669	20.8043	7.74261	2.97524	0.726661
	Pola1	1	0.728646	0.869565	0.77898	3.86928	3.26435	2.15085	1.81635	0.968535	0.851583
	Pole	1	0.694164	0.637338	0.708204	3.83167	2.52197	2.39794	1.20579	0.833474	0.490175
	Ppp2r2b	1	0.513694	0.343636	0.552858	0.592887	0.406183	0.132946	0.602228	0.669339	1.37113
	Ppp3ca	1	0.849695	0.641404	1.24869	0.533115	0.610084	0.229084	0.27099	0.55749	0.511415
	Prc1	1	0.735755	0.797748	1.03464	13.3866	15.6176	18.1267	6.36419	2.7343	0.683926
	Psmb10	1	0.877075	1.30674	0.772166	1.3682	1.24998	1.85517	3.50309	1.89889	1.84122
	PTCH1	1	0.25743	0.291608	0.855062	0.284797	0.295695	0.318659	0.264002	0.088253	0.473333
	Ptger4	1	5.28894	8.56036	4.81911	4.26182	4.79035	1.89179	9.70646	1.71188	1.43009
	Ptges3	1	7.41016	5.10987	10.0932	6.03525	1.85628	7.29691	2.06174	3.83371	1.72466
	Ptgs2	1	2.24385	1.98407	2.05775	1.69441	4.94309	1.18651	10.4982	0.643867	1.5246
	Ptn	1	1.59553	1.29289	1.75775	0.527142	0.737854	0.582412	4.89056	1.559	1.62649
	Ptprc	1	1.61108	3.57678	2.80808	1.09296	1.60893	0.966184	5.12729	1.32936	1.66063
	Pttg1	1	1.00717	0.842541	1.32126	5.80207	6.01228	12.3863	5.24473	2.58863	0.927683
	Rac2	1	1.54319	2.86297	1.94553	1.0575	1.5393	0.952938	3.71993	1.5311	2.05113
	Racgap1	1	0.712069	0.872682	1.09993	11.1337	8.67321	10.1621	4.13381	2.27733	0.95655
	Rad51c	1	0.117522	0.179394	0.619497	0.27604	0.444453	0.22994	0.371135	0.0947916	0.296696
	Rcc1	1	1.80049	8.07662	12.8096	2.7363	3.78772	2.17774	1.354	0.840425	1.09235
	Rela	1	0.80371	1.35741	2.13601	0.188578	0.81415	0.405882	0.28296	0.489646	0.361677
	Rhob	1	8.62002	3.69216	2.60811	2.07029	3.29368	2.79369	3.46343	2.14935	2.51747
	Rhoc	1	1.55406	1.38549	1.86586	1.87396	2.13185	1.75676	4.26584	1.9138	1.58618
	Ripk2	1	1.22304	2.15648	1.69211	0.980448	2.17587	1.02412	9.33271	1.09018	1.14791
	Rpa2	1	0.895202	1.31519	1.96434	4.74338	5.50017	4.39203	2.66712	1.12	0.990052
	Rprm	1	0.845539	0.263089	0.386854	0.579423	0.662241	0.452439	0.742967	1.99911	1.3623
	S100a11	1	2.1399	2.18584	3.64233	2.4111	2.81332	1.63046	7.0792	1.18982	1.24228
	Sass6	1	0.616232	1.49834	2.23742	5.81316	3.94388	4.93859	3.40329	1.67471	1.83957
	Serpine1	1	43.4379	15.933	5.00664	3.75026	11.0201	6.13314	16.0279	2.42819	3.42415
	Slfn2	1	1.60374	2.67004	2.44791	1.02778	1.51327	0.853544	3.77985	1.08503	1.66976
	Spag5	1	1.31852	1.09325	1.897	21.6319	14.7748	17.7294	6.65982	3.36246	1.20045
	Spbc25	1	0.629626	0.730778	0.499036	10.5987	9.7835	10.841	3.54464	2.0964	0.660594
	Spink1	1	8.51069	5.80547	11.6285	2.17618	17.7726	13.2589	19.4864	12.5645	36.3339
	Stk6	1	0.605615	1.16492	1.3959	12.2363	15.0252	15.251	4.05911	2.97333	0.654938
	Stmn1	1	0.979244	1.07344	0.924744	9.46524	10.0995	17.6333	7.03509	2.86654	0.931686
	Tacc3	1	1.05097	1.12488	1.50273	5.75673	4.97803	5.29578	2.25036	1.5517	0.871456
	Tcf19	1	0.565441	0.449102	0.602944	11.114	6.62697	6.55331	2.75008	1.53997	0.572757
	Tcfe2a	1	3.06655	2.89672	2.52693	6.19768	2.70533	10.0382	2.17817	0.956471	1.51464
	Tes	1	1.93561	2.52241	6.11853	1.78472	5.55112	1.98717	5.82331	2.39729	5.163
	Tgfbr2	1	0.763403	0.761501	0.716022	1.30442	0.826959	0.784409	9.20363	0.955584	0.595636
	Timp1	1	2.72289	4.65621	11.1514	5.61183	6.07258	4.19811	5.30549	0.96865	0.839518
	Tlr2	1	1.54976	2.54621	1.77084	0.810003	2.32806	0.741696	6.00736	1.15298	1.82835
	Tnf	1	4.17134	9.11921	6.65118	3.80317	4.45627	1.36076	21.8354	1.80929	2.87476
	Tnfrsf14	1	1.15689	3.28239	2.68829	1.08094	1.44565	0.572153	5.16252	1.38893	1.50663
	Tnfrsf21	1	3.96778	14.0528	13.7756	5.63816	8.4531	3.71269	5.63262	1.60736	1.53476
	Tnk2	1	1.48593	4.1826	3.08811	0.875368	1.13938	1.02305	0.638863	0.555756	0.85587
	Traf4af1	1	0.955488	2.0805	1.44477	22.8345	15.6292	35.1508	15.7339	13.2813	2.41852
	Ttk	1	3.4021	1.87562	1.68397	37.5111	28.8245	26.0009	11.9774	5.84151	2.14907
	Tubb5	1	1.01841	1.55571	1.41796	5.73749	6.05435	7.42087	3.35323	1.21903	0.858975
	Ubd	1	1.32238	1.15181	0.193878	0.235027	0.352924	0.58086	3.17995	0.303153	1.54232
	Ube2c	1	0.83542	1.00531	1.29849	9.91479	7.9066	11.47	4.49291	2.63863	0.850315
	Ubr2	1	0.36018	0.165946	0.248153	0.222219	0.469321	0.354608	0.408466	0.132114	0.447682
	Uhrf1	1	0.692772	1.15716	0.499582	7.25299	3.78918	3.67427	2.0776	0.874276	0.301243
	Vcam1	1	2.3585	2.67165	3.81963	1.0313	1.6652	1.06107	7.56428	1.05244	0.984983
	Wee1	1	1.16977	0.982582	1.88439	6.14284	4.57786	4.70931	2.78571	1.90769	1.23781
	Zfp365	1	0.421811	0.22709	0.539173	1.95642	0.216379	0.772386	1.05128	0.774964	0.705502
	Red and green colors represent the up-regulated and down-regulated expression, respectively.
